# Supplementary material
Source: MDPI journal article supplement (https://www.mdpi.com/1424-2818/13/10/500)
Supplement: s1 [file s1 › diversity-1403381-supplementary.pdf]

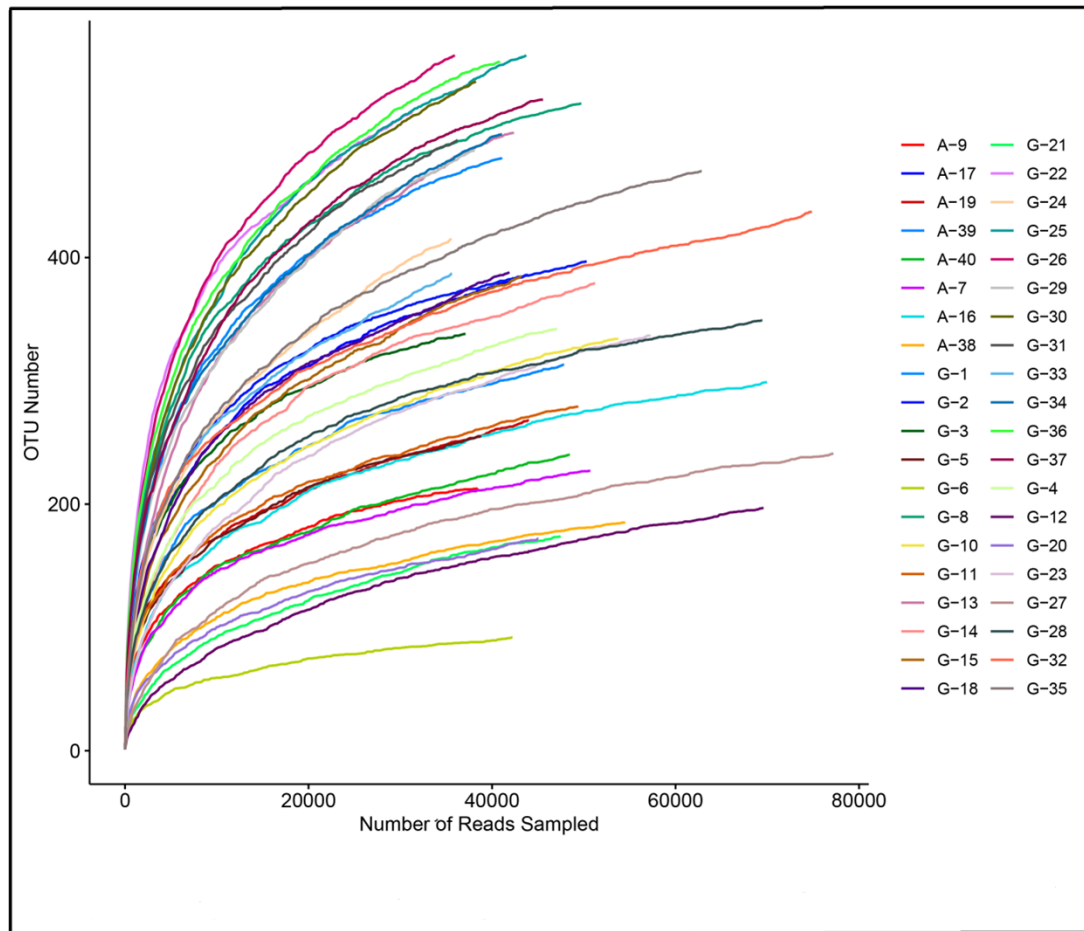

**Figure S1.** Rarefaction curves for 16S rRNA gene from penguin fecal samples. Operational taxonomic units (OTUs) in this analysis were defined at 97% sequence identity.

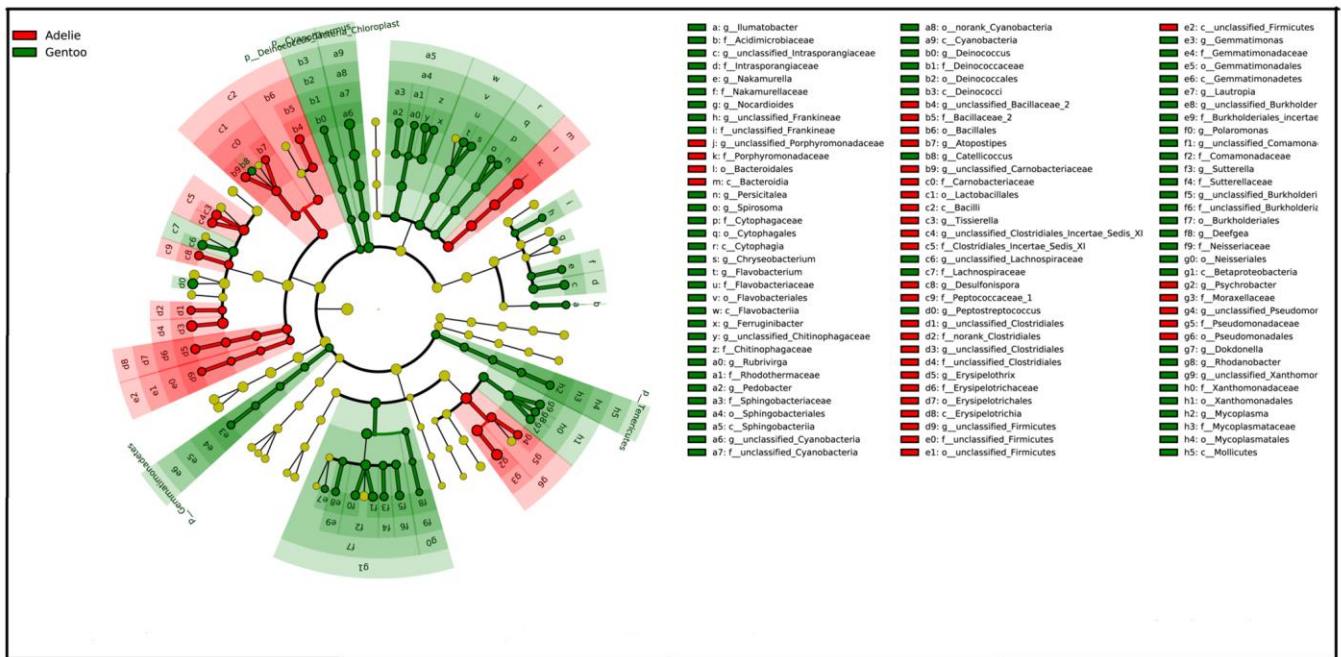

**Figure S2.** Cladogram indicated the phylogenetic distribution of fecal microbiota associated with Adélie and Gentoo penguin groups. Each dot represented a taxonomic entity and the taxonomic levels ranged from phylum to genus from the inner to outer circles.
